# Supplementary material for: Intermolecular base stacking mediates RNA-RNA interaction in a crystal structure of the RNA chaperone Hfq
Source: PubMed Central journal article supplement (PMC5575007; doi:10.1038/s41598-017-10085-8), 2017-08-29
Supplement: 41598_2017_10085_MOESM1_ESM.pdf [file 41598_2017_10085_MOESM1_ESM.pdf]

# Intermolecular base stacking mediates RNA-RNA interaction in a crystal structure of the RNA chaperone Hfq

**Eike C. Schulz<sup>1,2,5</sup>, Markus Seiler<sup>1,6</sup>, Cecilia Zuliani<sup>1</sup>, Franka Voigt<sup>1,7</sup>, Vladimir Rybin<sup>3</sup>, Vivian Pogenberg<sup>2</sup>, Norbert Mücke<sup>4</sup>, Matthias Wilmanns<sup>2</sup>, Toby J. Gibson<sup>1</sup>, and Orsolya Barabas<sup>1\*</sup>**

<sup>1</sup>) European Molecular Biology Laboratory, Structural and Computational Biology Unit, 69117 Heidelberg, Germany

<sup>2</sup>) European Molecular Biology Laboratory, Hamburg Outstation, Hamburg D-22603, Germany

<sup>3</sup>) European Molecular Biology Laboratory, Protein Expression and Purification Core Facility, 69117 Heidelberg, Germany

<sup>4</sup>) German Cancer Research Center, Division Biophysics of Macromolecules, Heidelberg D-69120, Germany

<sup>5</sup>) Present Address: Max Planck Institute for the Structure and Dynamics of Matter, Luruper Chaussee 149, 22761 Hamburg, Germany

<sup>6</sup>) Present Address: Buchmann Institute for Molecular Life Sciences, Max-von-Laue-Str. 15, 60438 Frankfurt a.M., Germany

<sup>7</sup>) Present Address: Friedrich Miescher Institute for Biomedical Research, Maulbeerstrasse 66, 4058 Basel, Switzerland

<sup>\*</sup>) Correspondence and requests for materials should be addressed to O.B. (E-mail: [barabas@embl.de](mailto:barabas@embl.de))

## Supplementary Information

### Supplementary Tables:

**Table S1: Summary of AUC data: Expected and measured sedimentation coefficients for the various samples.**

| SAMPLE                                  | Expected [S] |       | Measured [S] |
|-----------------------------------------|--------------|-------|--------------|
|                                         | monomer      | dimer |              |
| Hfq72 <sub>6</sub>                      | 3.2*         |       | 3.1          |
| A <sub>20</sub>                         | 1.3*         |       | 1.5          |
| 'AAO'                                   | 1.3**        |       | 1.3          |
| Hfq72 <sub>6</sub> -A <sub>20</sub>     | 3.9*         | 6.0*  | 5.1          |
| Hfq72 <sub>6</sub> -‘AAO’               | 3.9**        |       | 3.8          |
| Hfq <sup>102</sup>                      |              |       | 3.5          |
| <i>fhIA</i>                             |              |       | 2.1          |
| OxyS                                    |              |       | 2.0          |
| Oxy0                                    |              |       | n.d.         |
| <i>fhIA</i> + OxyS                      |              |       | 2.1          |
| Hfq102 <sub>6</sub> - <i>fhIA</i>       |              |       | 4.5          |
| Hfq102 <sub>6</sub> -OxyS               |              |       | 4.5          |
| Hfq102 <sub>6</sub> - <i>fhIA</i> -OxyS |              |       | 4.3 / 5.9    |
| Hfq102 <sub>6</sub> - <i>fhIA</i> -Oxy0 |              |       | 4.4          |

\*Calculated from the Hfq72<sub>6</sub>-A<sub>20</sub> crystal structure in program HYDROPRO 5a<sup>1,2</sup>;

\*\*Predicted based on the values calculated for the A<sub>20</sub> RNA.

**Table S2: Properties of candidate sRNAs**

| sRNA | sRNA length (nt) | (ARN) <sub>x</sub> motif coordinates | Distance to poly-U (nt) |
|------|------------------|--------------------------------------|-------------------------|
| OxyS | 117              | 65-86                                | 23                      |
| OhcC | 77               | 21-43                                | 24                      |
| MicM | 84               | 26-43                                | 33                      |
| MgrR | 98               | 37-53                                | 38                      |
| RyjA | 140              | 86-100                               | 32                      |

Coordinates of sRNAs are given with respect to the first nucleotide

**Table S3: sRNA and mRNA complementary regions**

|       |             | sRNA      |                          | mRNA                     |           |             |
|-------|-------------|-----------|--------------------------|--------------------------|-----------|-------------|
| Group | coordinates | sequence  | sequence                 | coordinates              |           |             |
| OxyS  | I           | 23;30     | AACCCUUG                 | CAAGGGUU                 | 34;41     |             |
|       | II          | 64;75     | GAAUAACUAAAG             | CUAUAGUUAGUC             | -57;-46   | <i>fhfA</i> |
|       | III         | 96;104    | UCUCCAGGA                | UCCUGGAAGA               | -15;-6    |             |
| OhsC  | I           | 2;20      | UUGAGGGUGCAUGCUGCAC      | GUGCAGCAUGCACCCUCA       | -94;-76   |             |
|       | II          | 38;44     | GUAAAAC                  | GUUUUAC                  | 52;58     | <i>shoB</i> |
|       | III         | 50;56     | UUCCUUA                  | UAAGGAA                  | -13;-7    |             |
| MicM  | I           | 1;9       | ACACCGUCG                | CGCCGGUGU                | 45;53     |             |
|       | II          | 13;37     | AAAGUGACGGCAUAAUAAUAAAAA | UUUUUAAUUUU              | -62;-53   |             |
|       | III         | 33;45     | AAAAAUGAAA               | UUUUUAAUUUUUUAU          | -70;-56   | <i>ybfM</i> |
|       | IV          | 42;56     | AAUCCUCUUUGACG           | UUUUUAAUUUUUCGUGUACCCUUU | -62;-37   |             |
| MicM  | I           | 7;15      | UCGCUAAA                 | UUUAAGUGA                | -124;-116 |             |
|       | II          | 17;25     | UGACGGCAU                | AUCCGUCA                 | -39;-32   |             |
|       | III         | 29;38     | AAUAAAAAA                | UUUUAAUUUAU              | -184;-174 | <i>dpiB</i> |
|       | IV          | 34;43     | AAAAAUGAAA               | UUUGCAUUUUU              | 28;38     |             |
|       | V           | 46;57     | CCUCUUUGACGG             | CCGUCAAGAGG              | -37;-26   |             |
|       | VI          | 62;68     | AUAGCGA                  | UCGCUAU                  | -250;-244 |             |
| MgrR  | I           | 15;23     | GCAGGAAA                 | UUUCCCGUC                | -68;-59   |             |
|       | II          | 39;46     | AAGCAAAA                 | UUUUUGCUU                | 40;48     |             |
|       | III         | 50;56     | AAAUUA                   | UAGAUUU                  | -99;-93   | <i>eptB</i> |
|       | IV          | 52;68     | AUCUAUCCAUGCAAGCA        | UGUUUGCAUGAGAUACAU       | -7;11     |             |
|       | V           | 61;68     | UGCAAGCA                 | UGCUUGCA                 | 44;51     |             |
| MgrR  | I           | 11;21     | CAGUCAGGAA               | UUCUGCCUG                | -23;-14   |             |
|       | II          | 21;31     | AUGCCUGUU                | AACAGGAU                 | -380;-373 |             |
|       | III         | 32;39     | AGCGUAAA                 | UUGUACGCU                | -60;-54   |             |
|       | VI          | 69;82     | UUCACCGCCGGUUU           | GGCGGUGAA                | -151;-145 | <i>rsxE</i> |
|       |             |           |                          | CCGCGCGGUG               | -94;-87   |             |
|       |             |           |                          | ACCGGCG                  | -114;-108 |             |
| V     | 84;93       | CUGGCGGUU | AAACGCCAG                | -369;-363                |           |             |
| RyjA  | I           | 11;19     | CGGAACC                  | GGUCCG                   | -74;-68   |             |
|       | II          | 25;34     | CACCACGUGCUG             | CGAGCACUGUG              | -29;-19   | <i>tig</i>  |
|       | III         | 70;77     | UGUACCAG                 | CUGGUAACA                | -112;-100 |             |
| RyjA  | I           | 45;54     | GUUGACGUCG               | CGAGGUCAAC               | 39;68     |             |
|       | II          | 69;79     | GUGUACCAGCG              | CGCUGGUAAC               | -55;-46   | <i>nuoG</i> |

Start and end coordinates of the complementary regions are indicated, separated by semicolon.

Coordinates of sRNAs are given with respect to the first nucleotide and coordinates of mRNAs are given with respect to the first base of the translation. Roman numbers in the column labeled ‘Group’ indicate distinct complementary regions as shown in Figure 4.

**Table S4: (ARN)<sub>x</sub> motif and RBS coordinates of selected mRNAs**

| mRNA        | (ARN) <sub>x</sub> motif coordinates | (ARN) <sub>x</sub> motif sequences | (ARN) <sub>x</sub> motif distance (nt) | RBS coordinates | RBS sequence             |
|-------------|--------------------------------------|------------------------------------|----------------------------------------|-----------------|--------------------------|
| <i>fhlA</i> | -75;-70<br>-9;-1                     | AAUAAA<br>AAGAACAAA                | 60                                     | -11;-6          | GGAAGACAAAA <b>AUG</b>   |
| <i>shoB</i> | -77;-72<br>-12;+2                    | AAUAAC<br>AAGGAAAAACGAAU           | 59                                     | -12;-8          | AAGGAAAAACGAA <b>AUG</b> |
| <i>ybfM</i> | -96;-86<br>-15;-3                    | AGUCAGCGAGA<br>AAAGAGGAUUAAC       | 70                                     | -13;-8          | AGAGGAUUAACCC <b>AUG</b> |
| <i>dpiB</i> | -78;-72<br>-10;+2                    | AAUUAU<br>AAGGAAAACAAU             | 61                                     | -10;-6          | AAGGAAAACA <b>AUG</b>    |
| <i>eptB</i> | -50;-42<br>+26;+34                   | AAAAGC<br>AGCAGAAGC                | 69                                     | -13;-9          | AGGGUUUGUUUG <b>CAUG</b> |
| <i>rsxE</i> | -10;-1<br>-144;-138                  | AAGAAAGA<br>AGAAUAAAGC             | 126                                    | -12;-8          | GGAGAAUAAAAC <b>GUG</b>  |
| <i>tig</i>  | -60;-54<br>-1;10                     | AACAAC<br>AGGUAACAAG               | 54                                     | -11;-7          | GAGGUACAAG <b>AUG</b>    |
| <i>nuoG</i> | -61;-54<br>-14;-1                    | AAAGAGC<br>AGAAAACUGGAAGC          | 40                                     | -12;-8          | GGAAGCAUGCUA <b>AUG</b>  |

Coordinates of mRNAs are given with respect to the first base of the translation.

## Supplementary Figures:

Figure S1

a

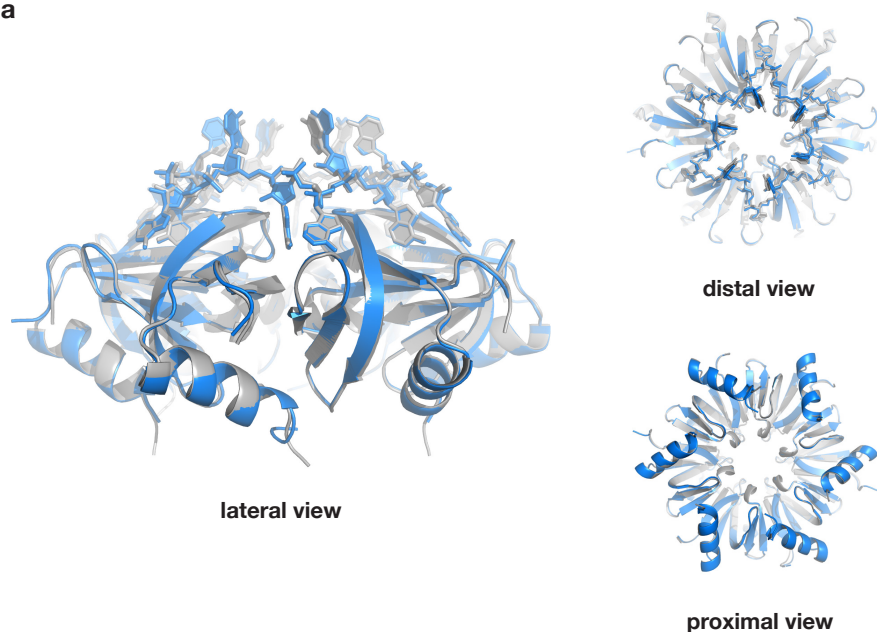

b

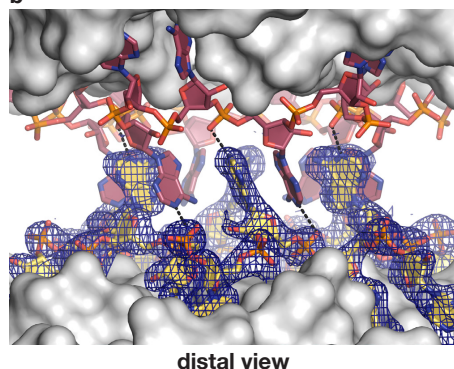

c

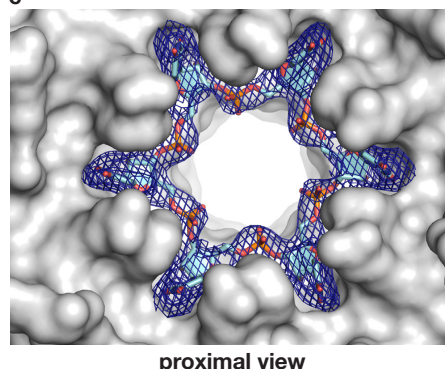

### Figure S1: Base stacking of Hfq-A<sub>18</sub> RNA complexes does not require alteration of the RNA configuration.

(a) Superposition of the base-stacked dimeric (Hfq72<sub>6</sub>:A<sub>18</sub>)<sub>2</sub> complex structure with a previously reported *E. coli* Hfq-poly(A) crystal structure (PDB ID 3GIB<sup>3</sup>) shows only small differences; the N-site bases are tilted by 15°.

(b) 2Fo-Fc simulated annealed omit map contoured at the 1.0  $\sigma$  level (blue mesh) showing clear density for the A<sub>18</sub> RNA on the distal face of the Hfq72 hexamer in the Hfq72<sub>6</sub>-A<sub>18</sub> complex.

(c) 2Fo-Fc simulated annealed omit map contoured at the 1.0  $\sigma$  level (blue mesh) at the proximal site suggests the presence of six uridine nucleotides. The binding geometry is practically identical with previously reported Hfq-poly(U) RNA complex structures<sup>4,5</sup>. Since no uridine containing RNA or nucleotides were included in the crystallization samples, this density probably originated from the cellular lysate or UTP contamination in the synthetic RNA probes. Maps were calculated in CNS<sup>6,7</sup>.

**Figure S2**

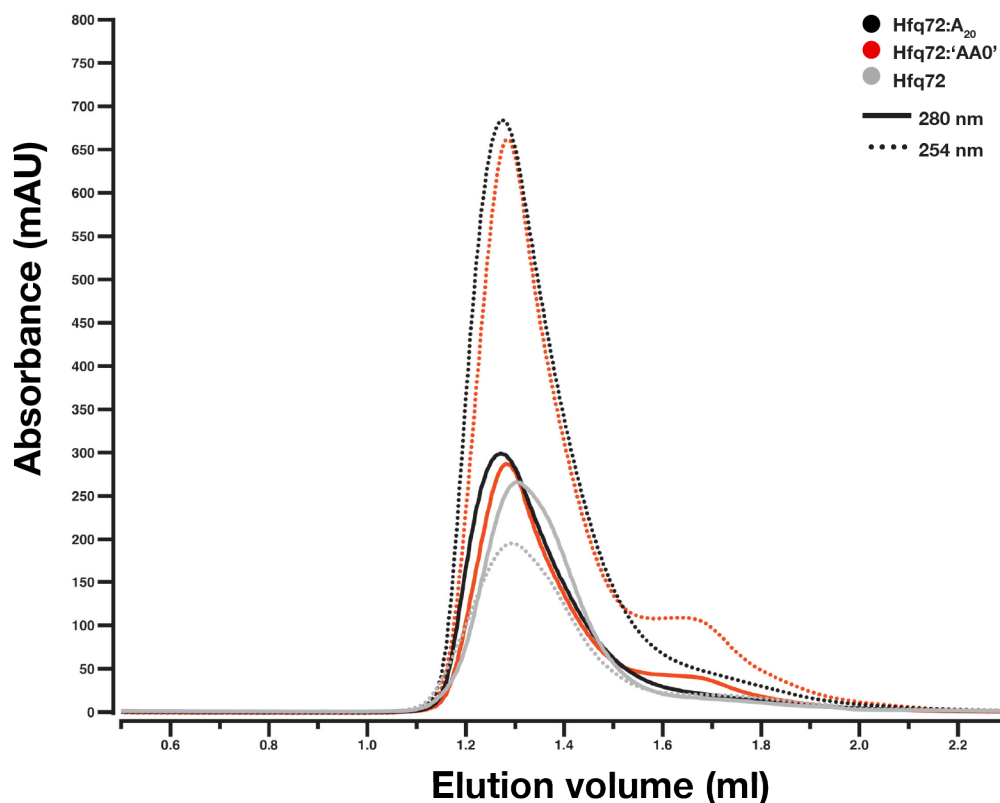

**Figure S2: Introduction of an abasic nucleotide in 'AA0' RNA does not compromise Hfq binding**  
Analytical size exclusion chromatogram of the Hfq72-A<sub>20</sub> RNA (black) complex, Hfq72-'AA0' RNA (red) complex, and Hfq72 alone (grey) on a Superdex S200 10/300 (GE Healthcare) column in AUC buffer (see Material and Methods). Solid lines show absorbance at 280 nm, while dashed lines show absorbance values measured at 254 nm. While RNA binding does not induce a significant difference in elution volume (1.30 ml and 1.27 ml for Hfq72 and Hfq72-A<sub>20</sub> complex, respectively) consistent with the moderate change in molecular size (Mw = 48.7 kDa and 55.2 kDa for Hfq72 and Hfq72-A<sub>20</sub> complex, respectively), the specific increase in 254 nm absorbance over the 280 nm absorbance in the complex samples, and the absence of a free RNA peak at 1.55 ml (data not shown) indicates similar levels of binding with both RNA molecules.

Figure S3

a

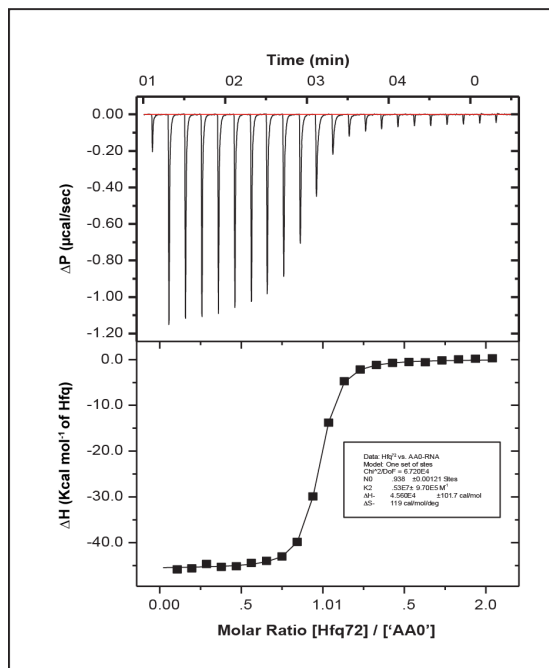

Hfq72 - 'AA0'

b

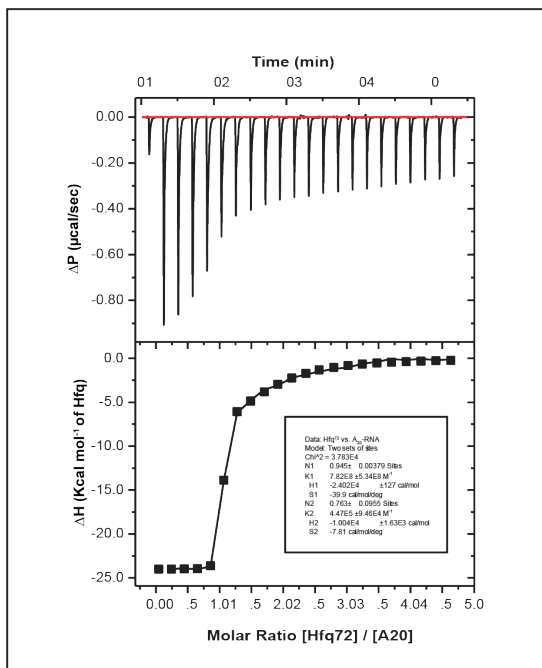

Hfq72 - A<sub>20</sub>

Figure S3: Isothermal titration calorimetry (ITC) of Hfq72 - 'AA0' and Hfq72 - A<sub>20</sub> binding

(a) ITC data for Hfq72 - 'AA0' RNA binding shows a single binding event with an affinity of  $K_D = 40$  nM. (b) ITC data for Hfq72 - A<sub>20</sub> RNA binding indicating two consecutive binding events. The first binding event is very strong ( $K_D = 1.3$  nM), while the second binding event has a much lower affinity ( $K_D = 2.2$   $\mu$ M). Due to the large difference in the affinities, it was difficult to de-convolute the two binding events by ITC.

**Figure S4**

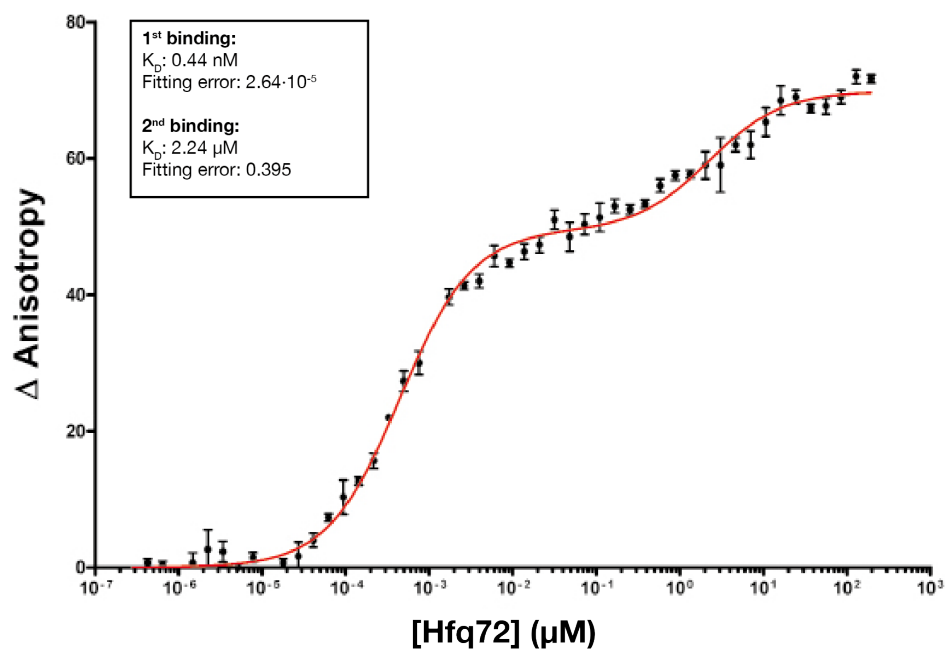

**Figure S4: Fluorescence anisotropy of Hfq72 - A<sub>20</sub> binding**

Anisotropy difference plotted against Hfq concentration ( $\mu$ M) clearly showing a double sigmoidal curve indicating two consecutive binding events. In good agreement with the ITC data, the first binding has a  $K_D$  of 0.4 nM, while for the second binding event has a  $K_D$  of 2.2  $\mu$ M. All data points were recorded in triplicates and error bars indicate the variation over these measurements.



Figure S5

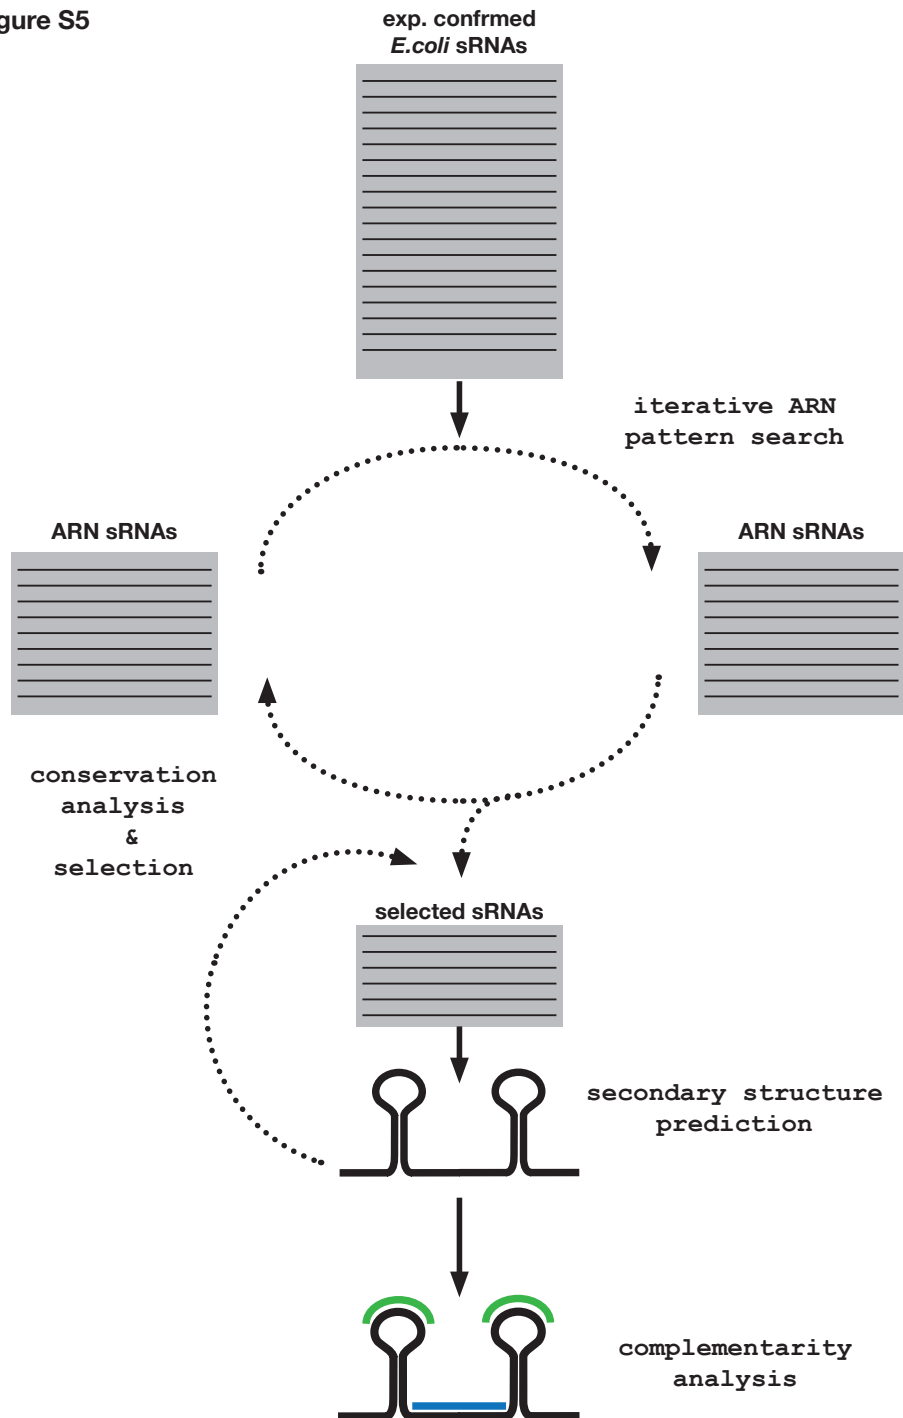

**Figure S5: Bioinformatic analysis of sRNAs: The overall pipeline**

An iterative  $(ARN)_X$  pattern search (see details in Materials and Methods) in 67 experimentally confirmed *E.coli* sRNAs resulted in 25 sRNAs containing 1, 2 or 4  $(ARN)_X$  motifs. From this list, 5 candidate sRNAs were found to share a similar architecture of structural and functional elements.

**Figure S6**

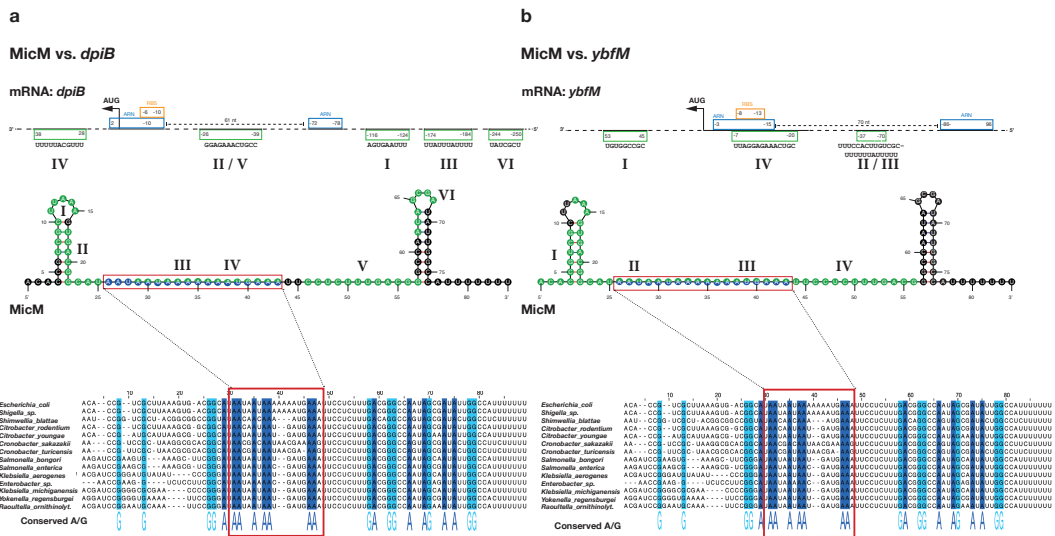

**Figure S6: (ARN)<sub>x</sub> motifs and mRNA seed regions mapped onto the predicted secondary structure of MicM**

The (ARN)<sub>x</sub> motif is found between two stem loops. Sequence alignment (bottom) for the (ARN)<sub>x</sub> motif containing region shows conservation of the motif among various species. The alignment contains sequences from the following species: *Escherichia coli* (NZ\_KI544438.1), *Shigella sp.* (NZ\_GG657387.1), *Shimwellia blattae* (NC\_017910.1), *Citrobacter rodentium* (NC\_013716.1), *Citrobacter youngae* (NZ\_GG730299), *Cronobacter sakazakii* (NC\_009778.1), *Cronobacter turicensis* (NC\_013282.2), *Salmonella bongori* (NC\_021870.1), *Salmonella enterica* (NZ\_KE349762.1), *Klebsiella aerogenes* (NZ\_KB911089.1), *Enterobacter sp.* (NZ\_KI535662.1), *Klebsiella michiganensis* (NZ\_JH603153.1), *Yokenella regensburgei* (NZ\_JH417874.1), *Raoultella ornithinolytica* (NC\_021066.1). Conserved A/G nucleotides are highlighted in blue/cyan. Seed regions for *dpiB* (a) and *ybfM* (b) pairing map to the stem loop structures (green dots). The topology of the targets mRNA *dpiB* (a) and *ybfM* (b) are shown above. (ARN)<sub>x</sub> regions (blue boxes) and seed regions (green boxes) are also marked. Roman numbers (consistent with Table S3) indicate the corresponding complementary sequences.

Figure S7

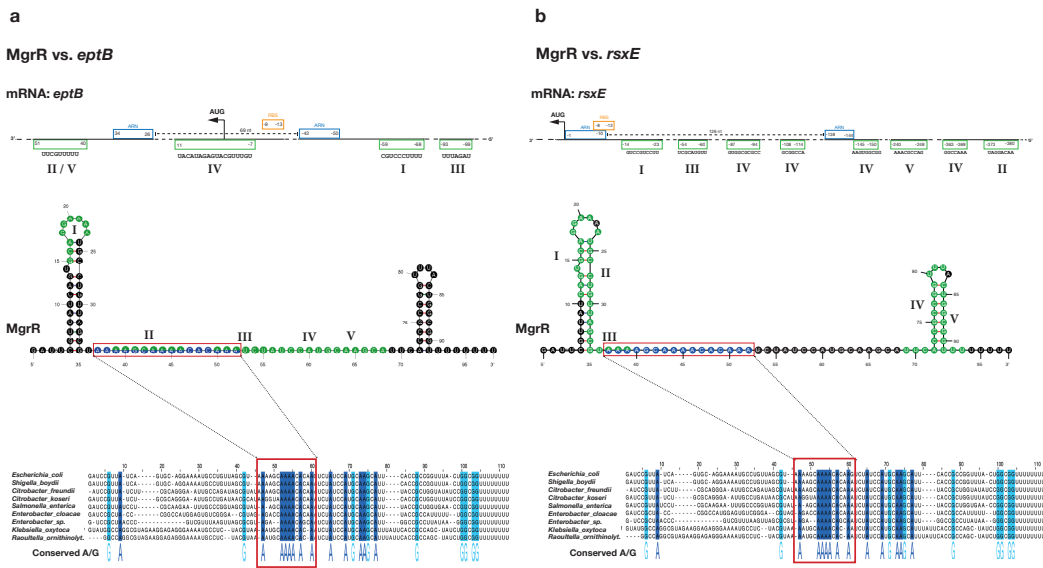

**Figure S7: (ARN)<sub>x</sub> motifs and mRNA seed regions in MgrR**

Structural and functional features of MgrR and its targets *eptB* (**a**) and *rsxE* (**b**) are shown as in Figure S6. The sequence alignment contains sequences of the following species: *Escherichia coli* (NZ\_KE136969.1), *Shigella boydii* (NC\_010658.1), *Citrobacter freundii* (NZ\_JH414886.1), *Citrobacter koseri* (NC\_009792.1), *Salmonella enterica* (NZ\_KE350125.1), *Enterobacter cloacae* (NZ\_KI535551.1), *Enterobacter sp.* (NC\_021500.1), *Klebsiella oxytoca* (NZ\_JH603146.1), *Raoultella ornithinolytica* (NC\_021066).

**Figure S8**

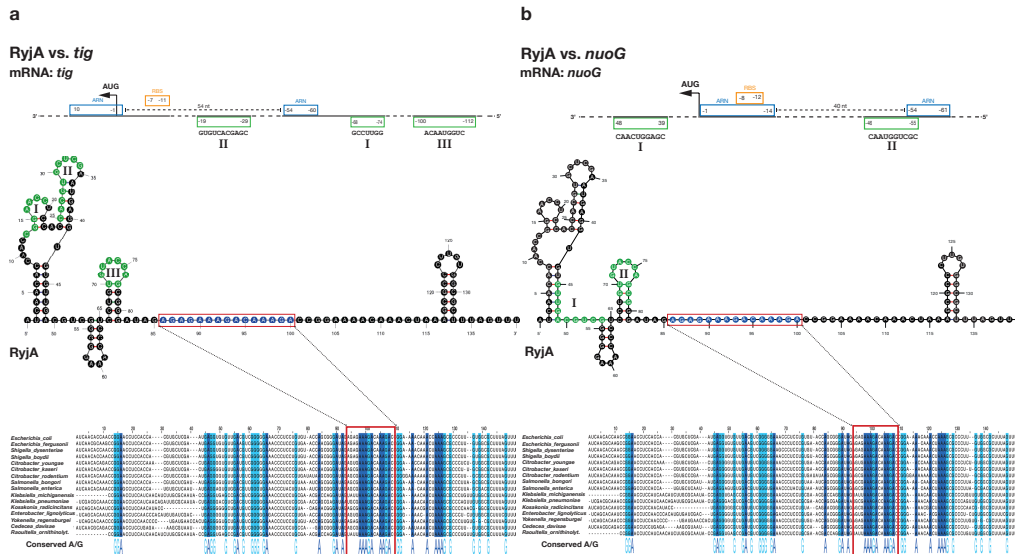

**Figure S8: (ARN)<sub>x</sub> motifs and mRNA seed regions in RyjA**

Structural and functional features of RyjA and its targets *tig* (a) and *nuoG* (b) are shown as in Figure S6. The sequence alignment contains sequences of the following species: *Escherichia coli* (NZ\_KE701224.1), *Escherichia fergusonii* (NZ\_CM001142.1), *Shigella dysenteriae* (NC\_007606.1), *Shigella boydii* (NC\_010658.1), *Citrobacter youngae* (NZ\_GG730304.1), *Citrobacter koseri* (NC\_009792.1), *Citrobacter rodentium* (NC\_013716.1), *Salmonella bongori* (NC\_021870.1), *Salmonella enterica* (NC\_010067.1), *Klebsiella michiganensis* (NZ\_JH603154.1), *Klebsiella pneumoniae* (NZ\_KI535504.1), *Kosakonia radicincitans* (NZ\_JH725436.1), *Enterobacter lignolyticus* (NC\_014618.1), *Yokenella regensburgei* (NZ\_JH417862.1), *Cedecea davisae* (NZ\_KE161030.1), *Raoultella ornithinolytica* (NC\_021066.1).

Figure S9

OhsC vs. *shoB*

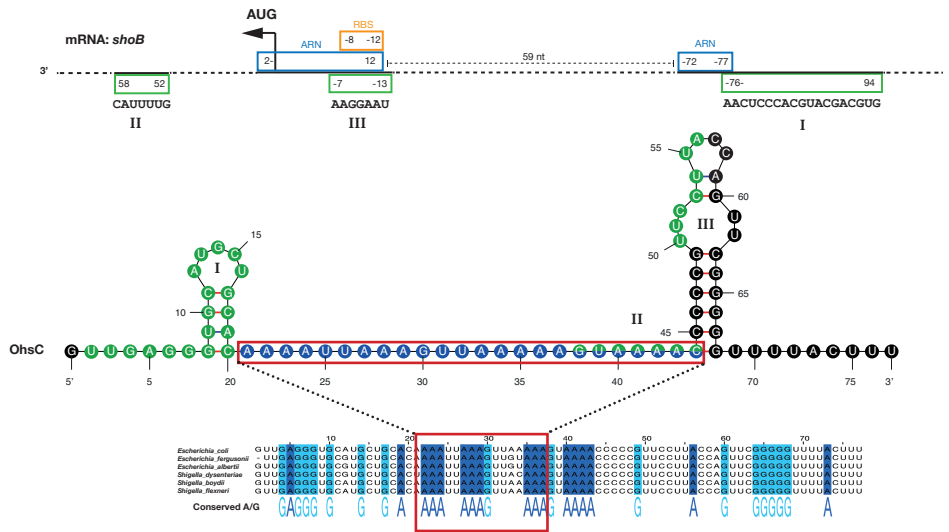

Figure S9: (ARN)<sub>x</sub> motifs and mRNA seed regions in OhsC

Structural and functional features of OhsC and its target *shoB* are shown as in Figure S6. The sequence alignment contains sequences of the following species: *Escherichia coli* (NZ\_CP013952.1), *Escherichia fergusonii* (NZ\_CM001142.1), *Escherichia albertii* (NZ\_CH991859.1), *Shigella dysenteriae* (NC\_007606.1), *Shigella boydii* (NC\_010658.1), *Shigella flexneri* (NC\_004337.2).

Figure S10

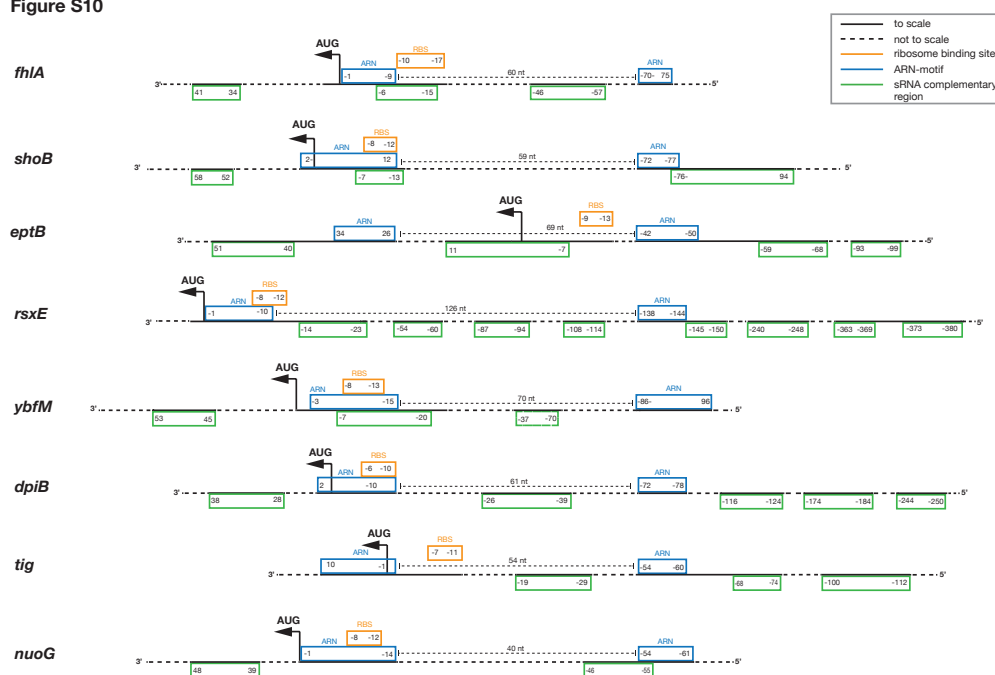

### Figure S10: Topology of target mRNAs

mRNAs are shown in 3' to 5' direction, with their (ARN)<sub>X</sub> motifs aligned. Solid lines indicate distances to scale, dashed lines mark distances that are not displayed to scale. (ARN)<sub>X</sub> motifs (blue), ribosome binding sites (orange), and sRNA complementary regions (green) are shown. The position of the first base of translation is indicated with an arrow pointing in the direction of the CDS. The distance between the two separate (ARN)<sub>X</sub> regions are also marked.

### References

- 1 Garcia De La Torre, J., Huertas, M. L. & Carrasco, B. Calculation of hydrodynamic properties of globular proteins from their atomic-level structure. *Biophys J* **78**, 719-730, doi:10.1016/S0006-3495(00)76630-6 (2000).
- 2 Ortega, A., Amoros, D. & Garcia de la Torre, J. Prediction of hydrodynamic and other solution properties of rigid proteins from atomic- and residue-level models. *Biophys J* **101**, 892-898, doi:10.1016/j.bpj.2011.06.046 (2011).
- 3 Link, T. M., Valentin-Hansen, P. & Brennan, R. G. Structure of Escherichia coli Hfq bound to polyriboadenylate RNA. *Proceedings of the National Academy of Sciences of the United States of America* **106**, 19292-19297, doi:10.1073/pnas.0908744106 (2009).
- 4 Schulz, E. C. & Barabas, O. Structure of an Escherichia coli Hfq:RNA complex at 0.97 Å resolution. *Acta crystallographica. Section F, Structural biology communications* **70**, 1492-1497, doi:10.1107/S2053230X14020044 (2014).
- 5 Sauer, E. & Weichenrieder, O. Structural basis for RNA 3'-end recognition by Hfq. *Proceedings of the National Academy of Sciences of the United States of America* **108**, 13065-13070, doi:10.1073/pnas.1103420108 (2011).
- 6 Brunger, A. T. Version 1.2 of the Crystallography and NMR system. *Nature protocols* **2**, 2728-2733, doi:10.1038/nprot.2007.406 (2007).
- 7 Brunger, A. T. *et al.* Crystallography & NMR system: A new software suite for macromolecular structure determination. *Acta Crystallographica Section D-Biological Crystallography* **54**, 905-921 (1998).
